# Supplementary figures and images for: Antiretroviral therapy duration and immunometabolic state determine efficacy of ex vivo dendritic cell-based treatment restoring functional HIV-specific CD8+ T cells in people living with HIV
Source: PubMed Central journal article supplement — eBioMedicine. 2022 Jun 2;81:104090. doi: 10.1016/j.ebiom.2022.104090 (PMC9301875; doi:10.1016/j.ebiom.2022.104090), 2022-06-02

# Supplementary figure 9

**a**

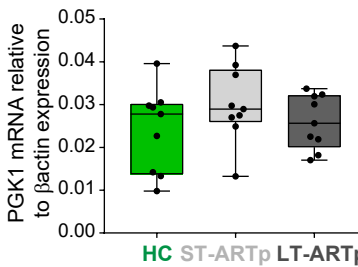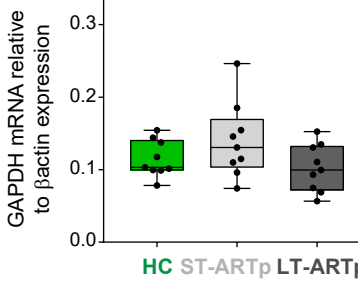

**c**

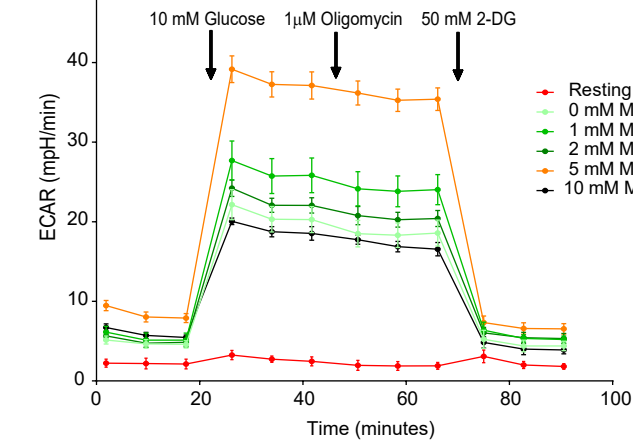

**b**

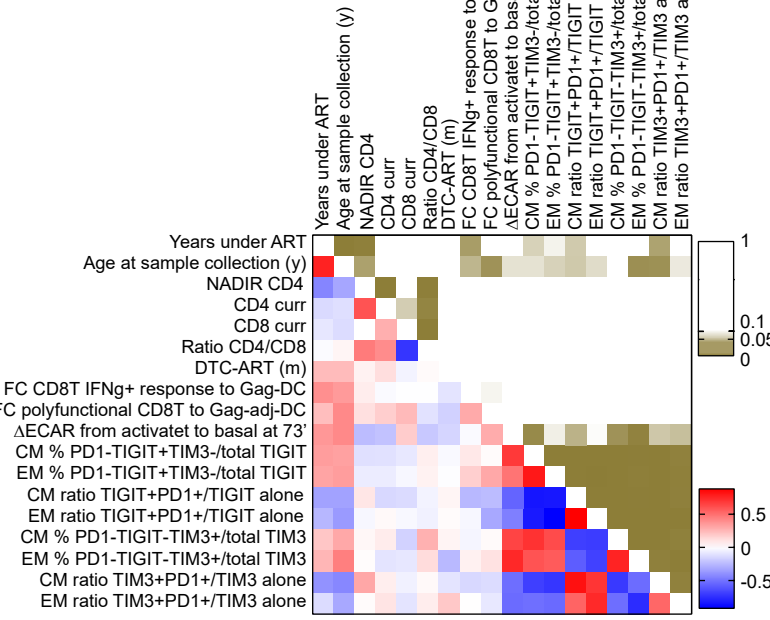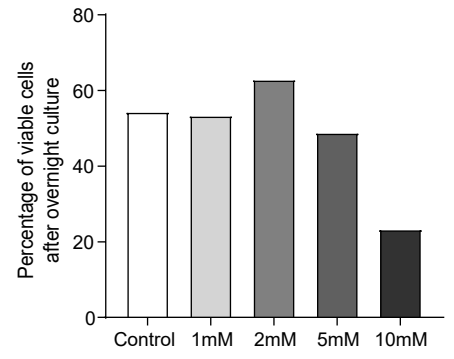

Supplement: mmc10.pdf [file mmc10.pdf]

# Supplementary figure 1

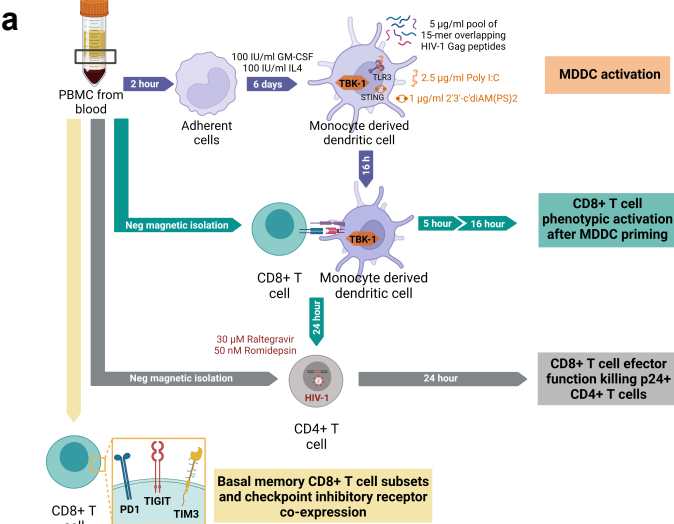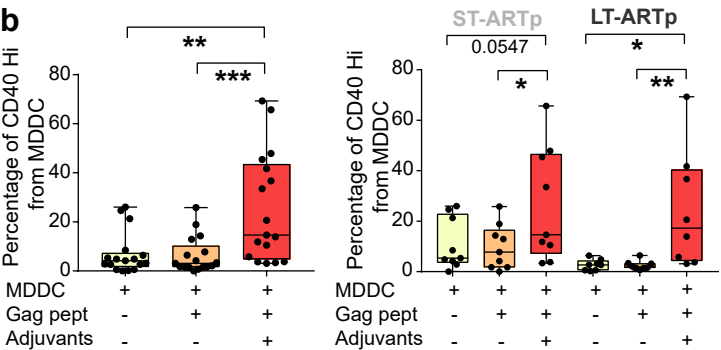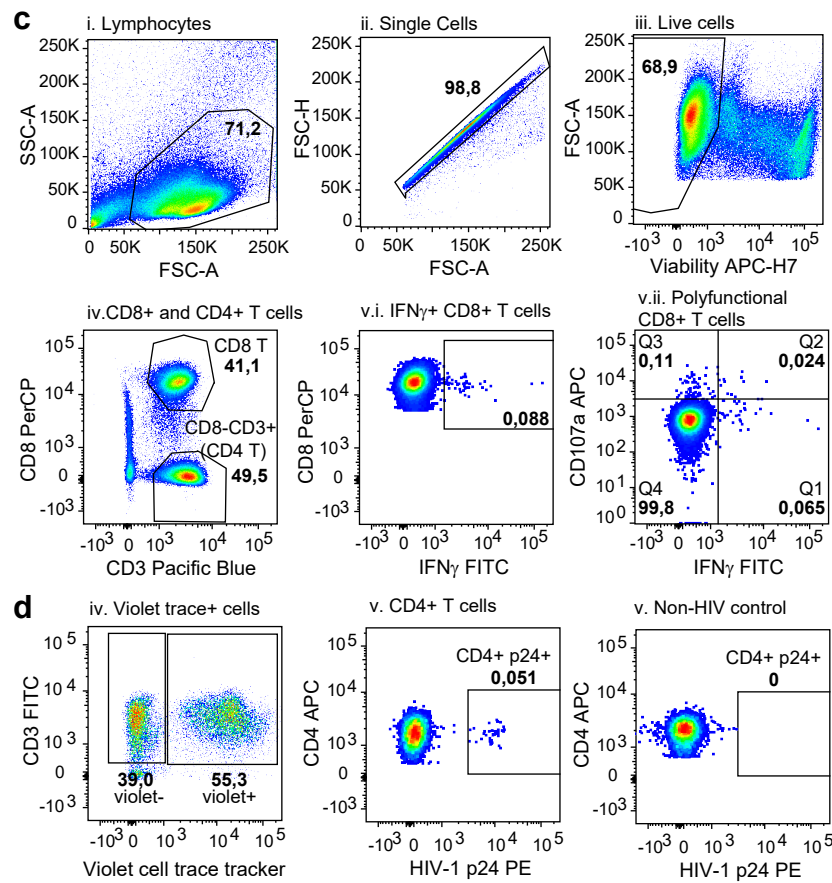

Supplement: mmc2.pdf [file mmc2.pdf]

# Supplementary figure 2

**a**

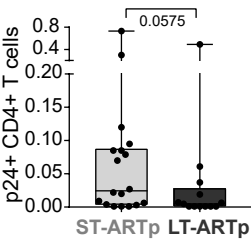

**b**

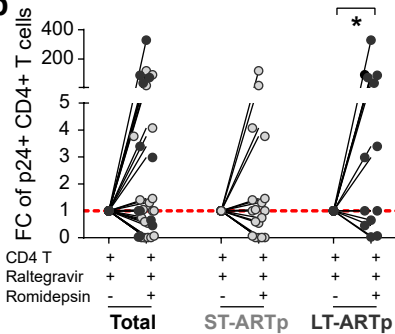

**c**

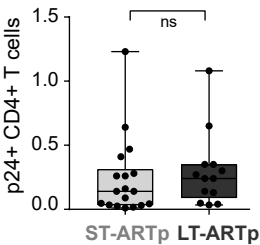

**d**

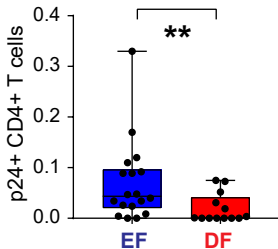

Supplement: mmc3.pdf [file mmc3.pdf]

# Supplementary figure 3

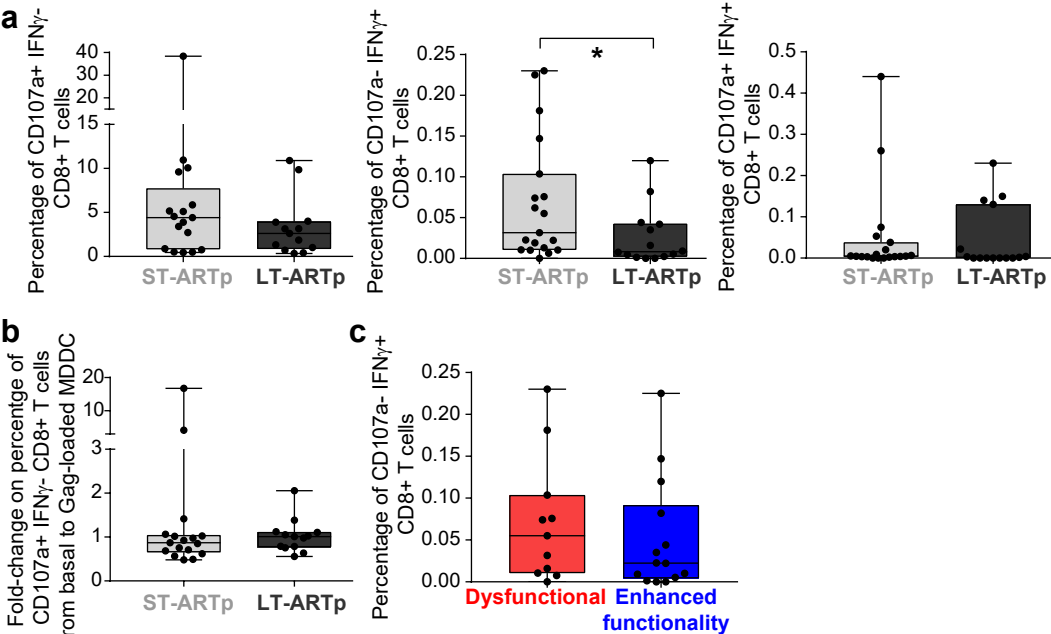

Supplement: mmc4.pdf [file mmc4.pdf]

# Supplementary figure 4

**a**

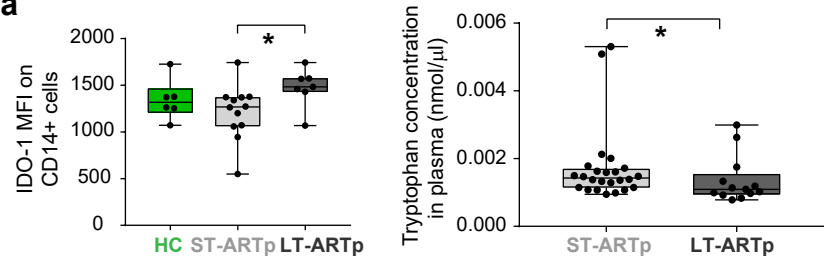

**b**

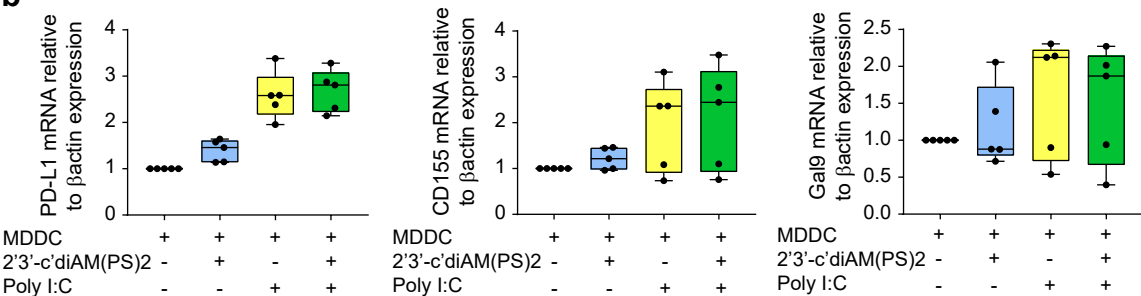

Supplement: mmc5.pdf [file mmc5.pdf]

# Supplementary figure 5

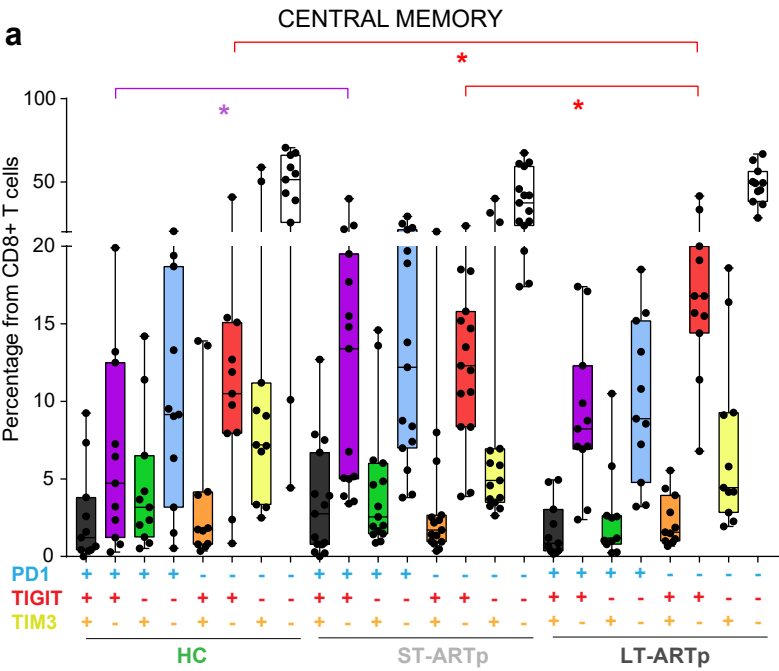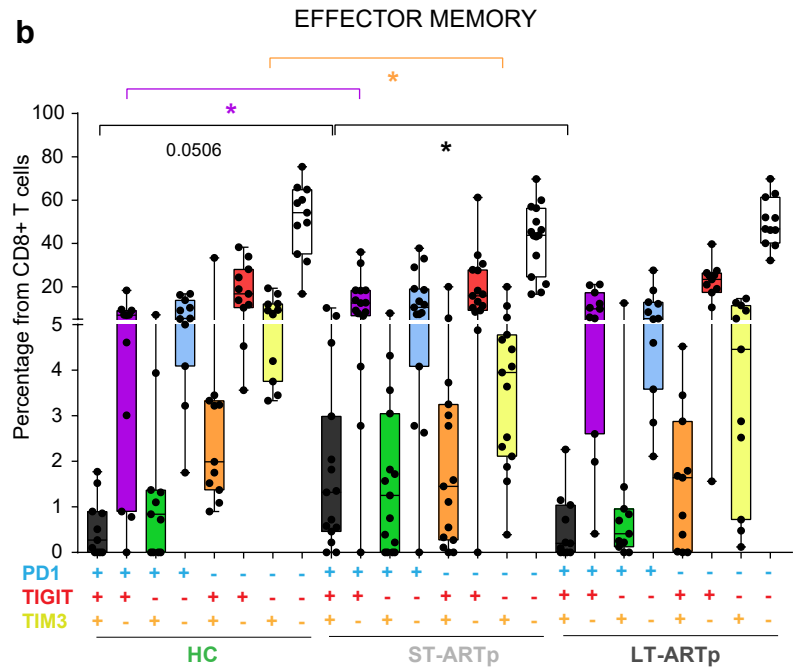

Supplement: mmc6.pdf [file mmc6.pdf]

# Supplementary figure 6

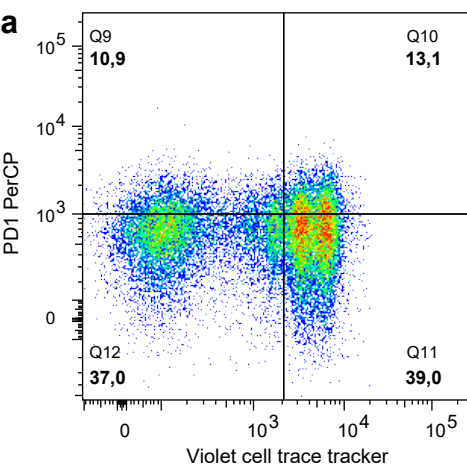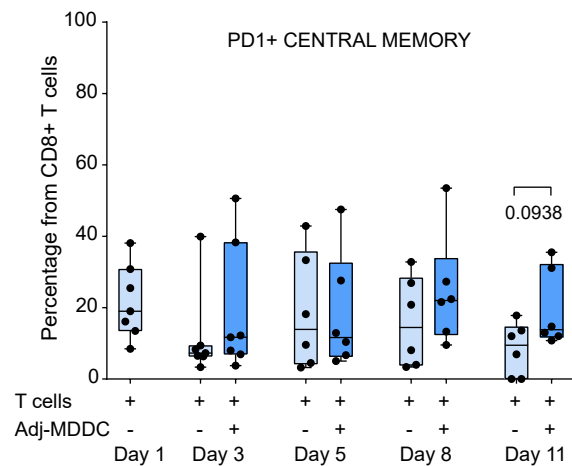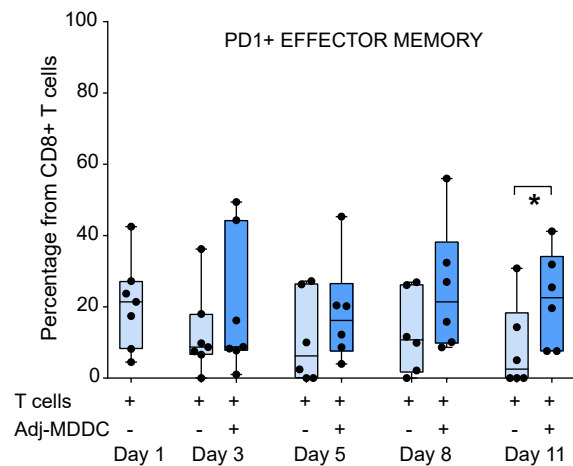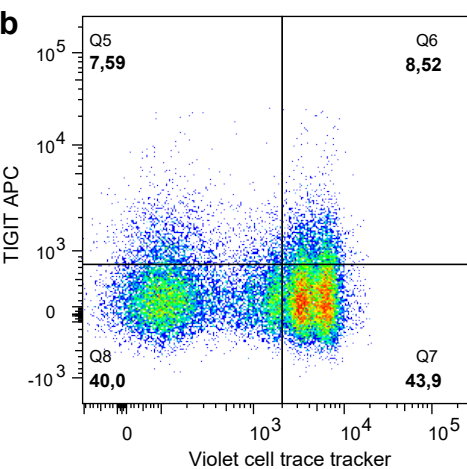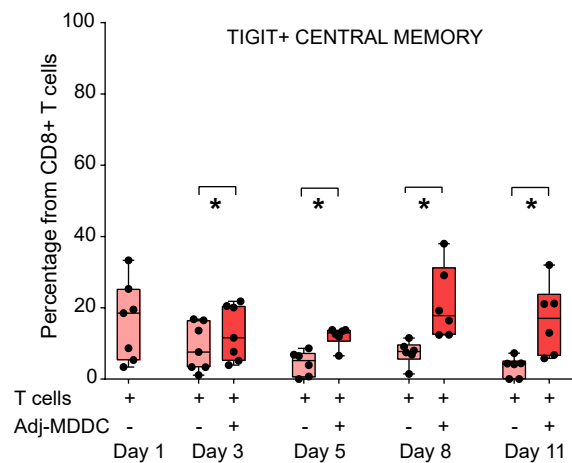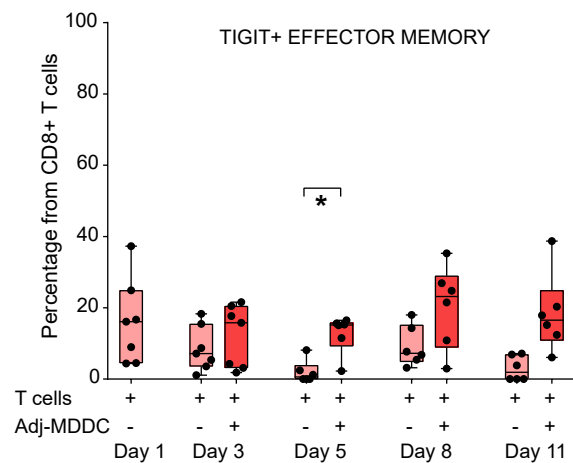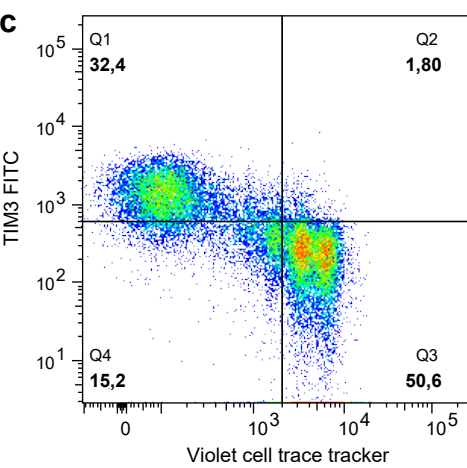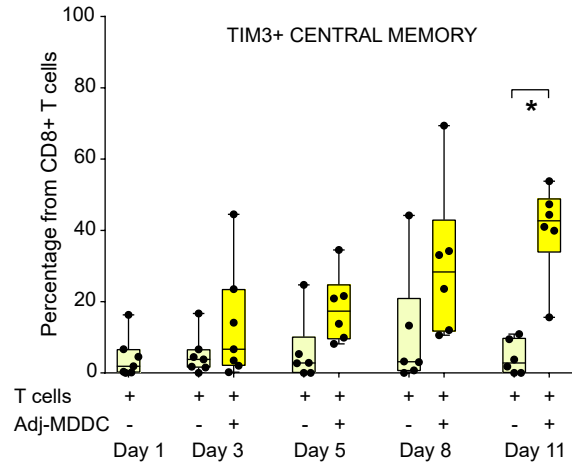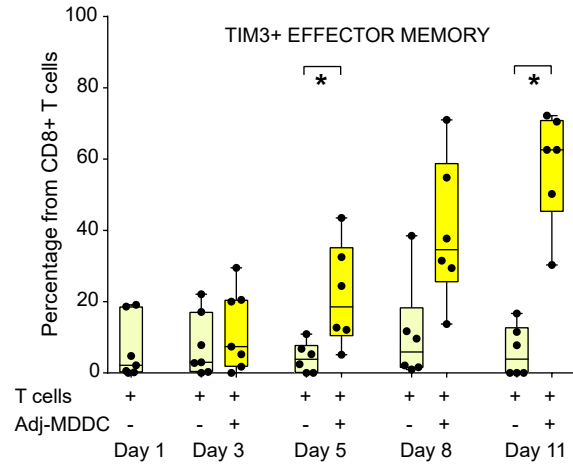

Supplement: mmc7.pdf [file mmc7.pdf]

**Supplementary figure 7**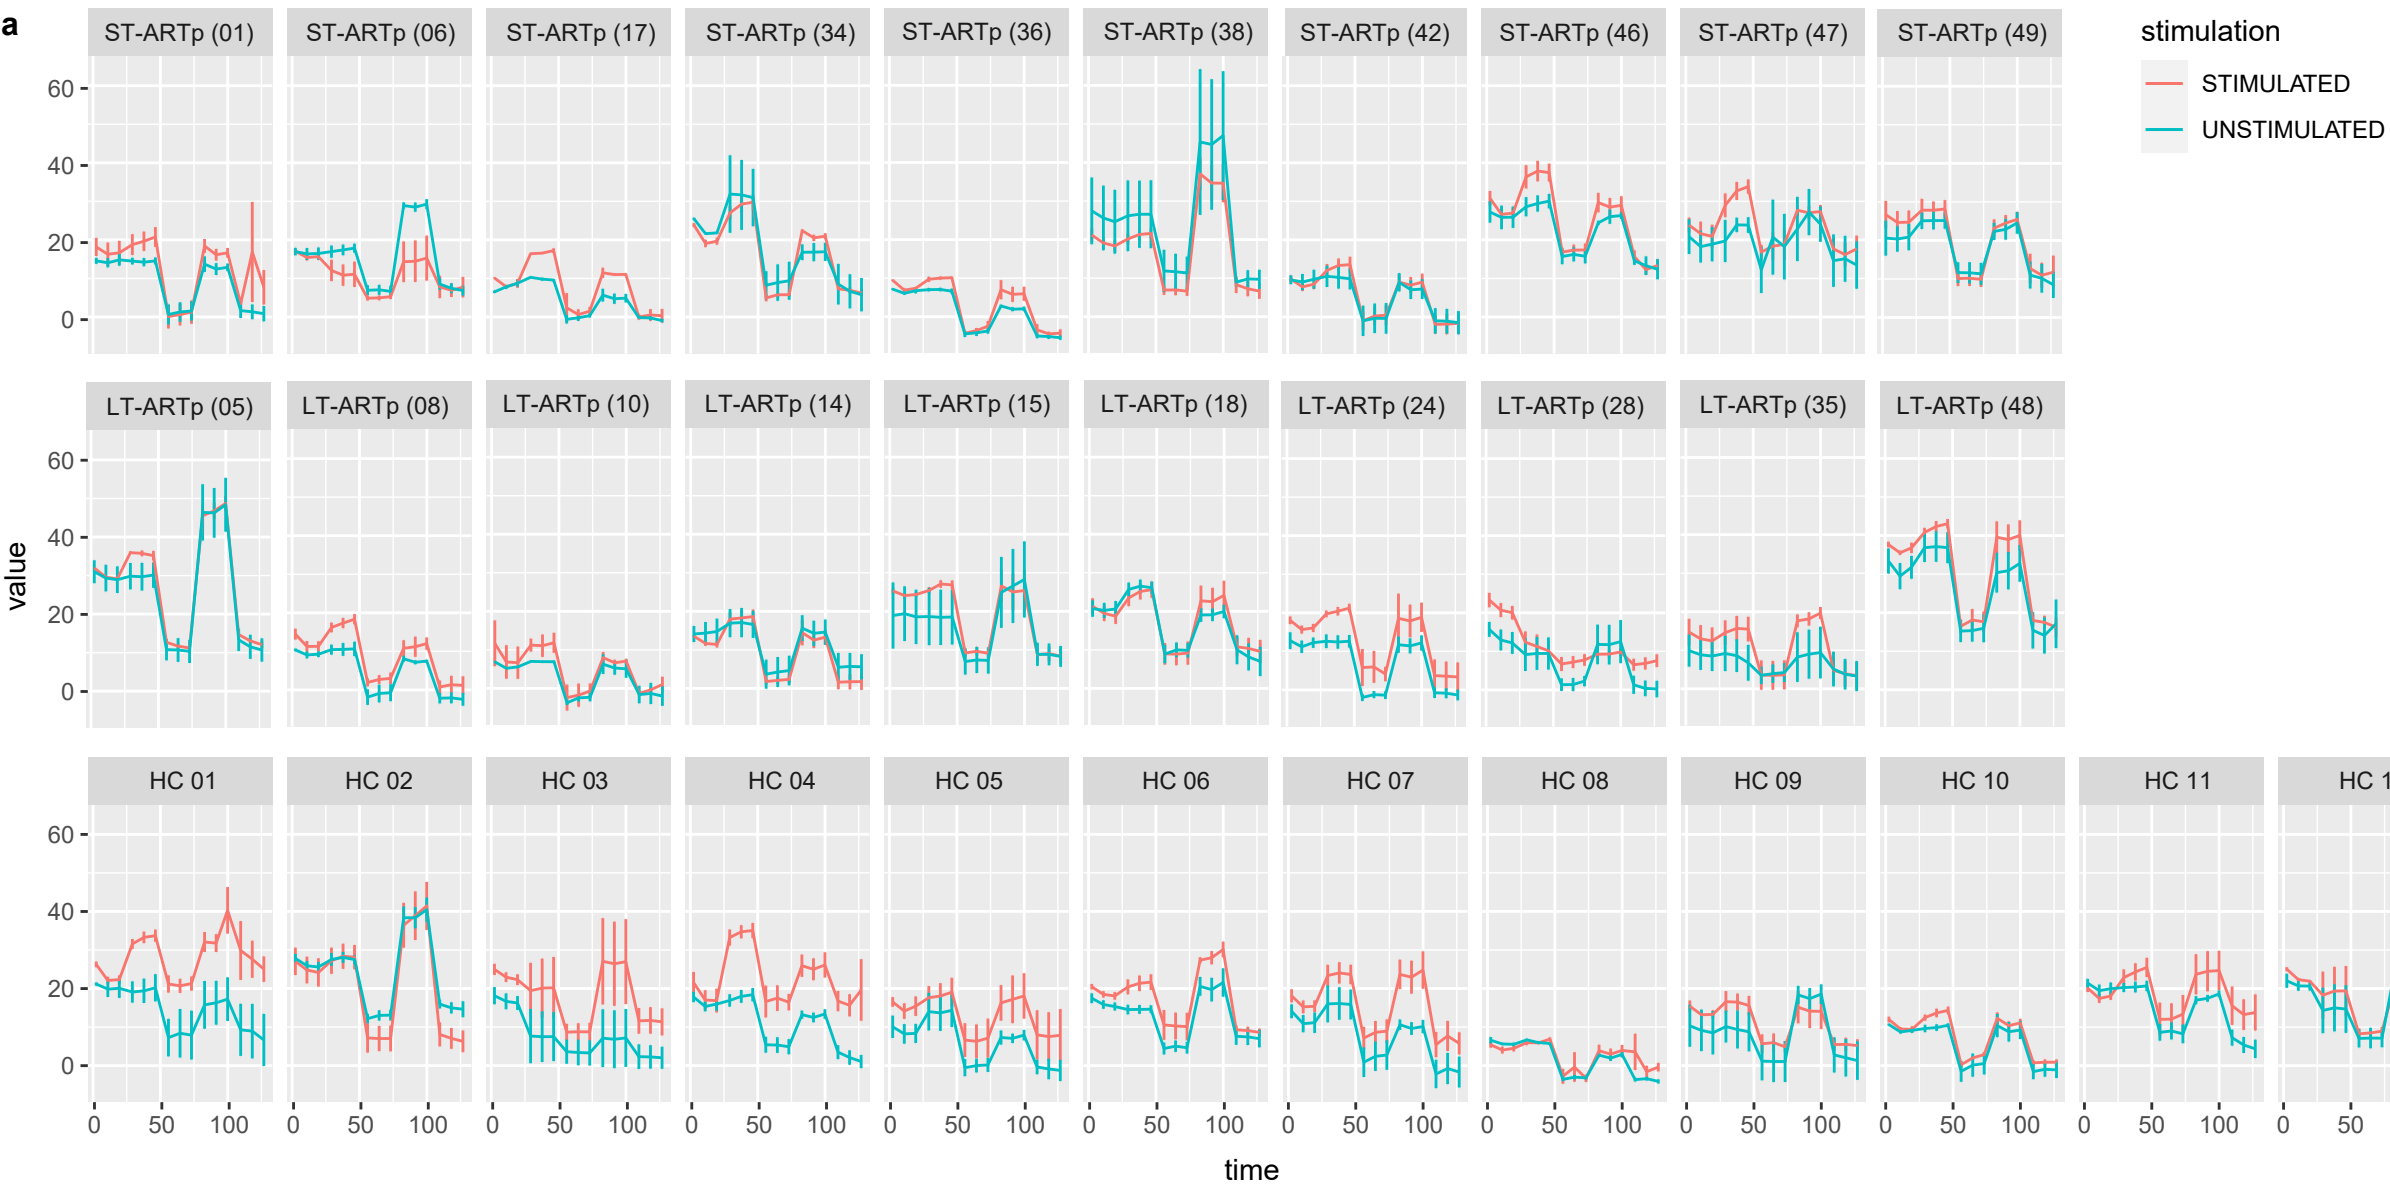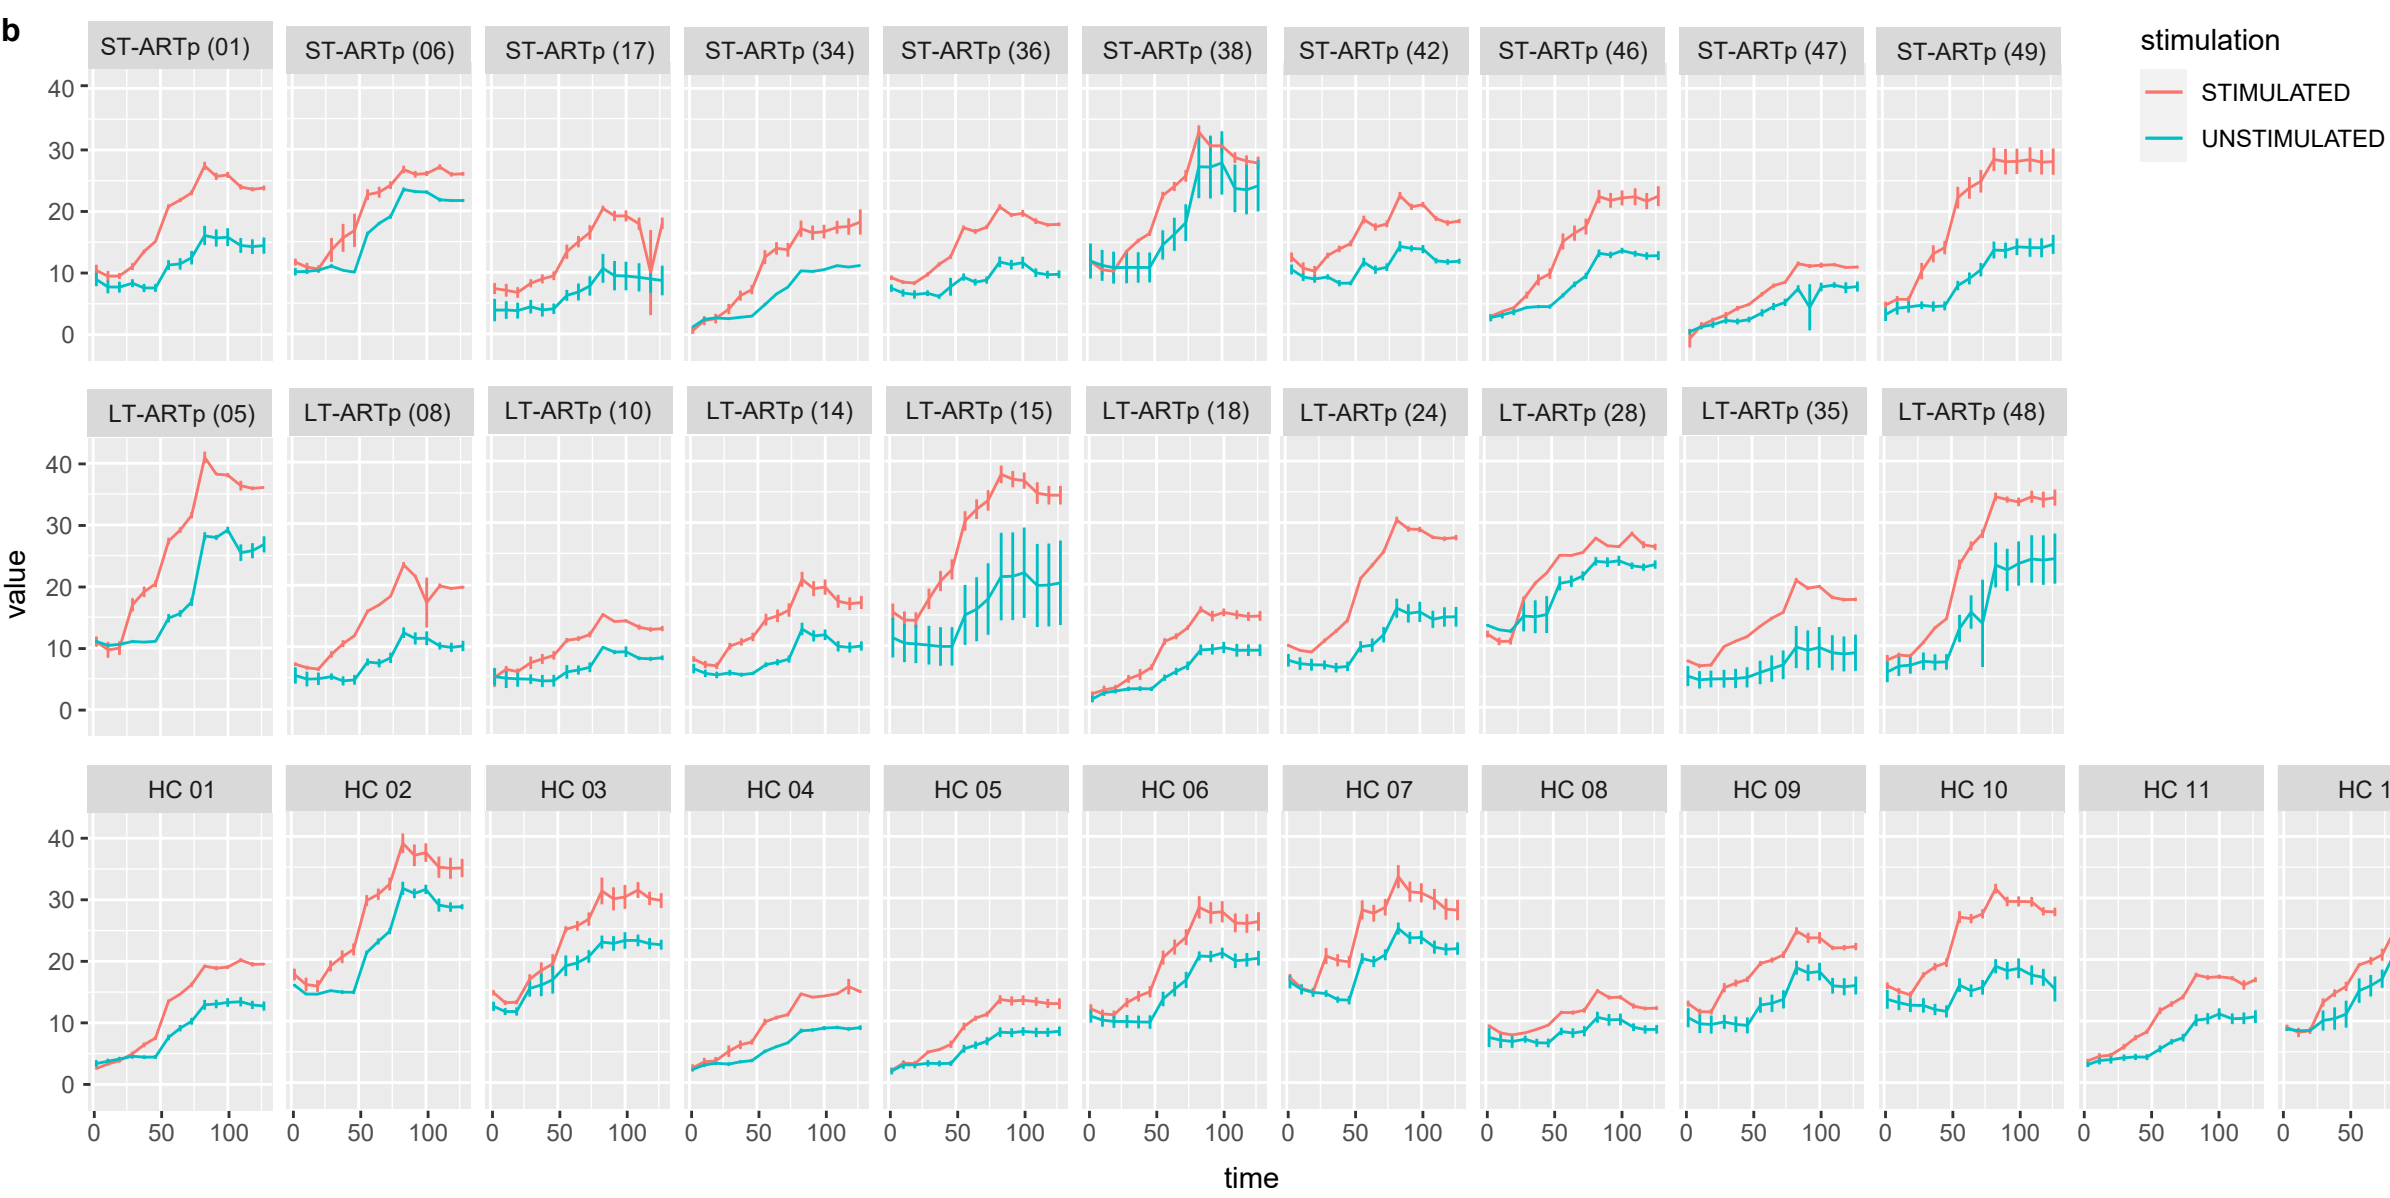

Supplement: mmc8.pdf [file mmc8.pdf]

# Supplementary figure 8

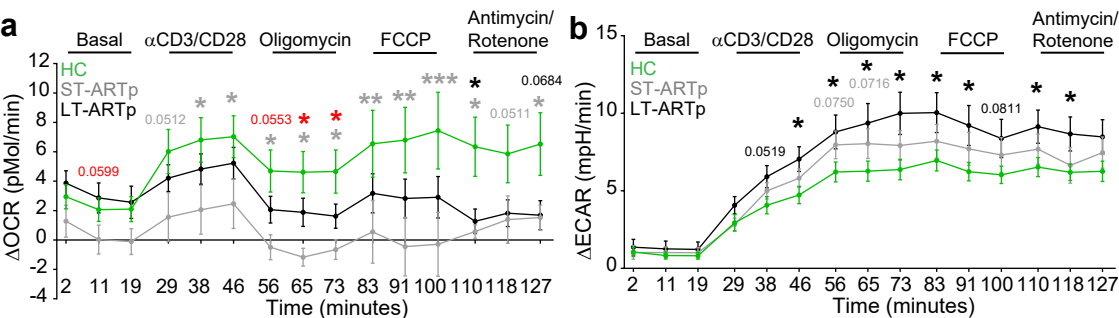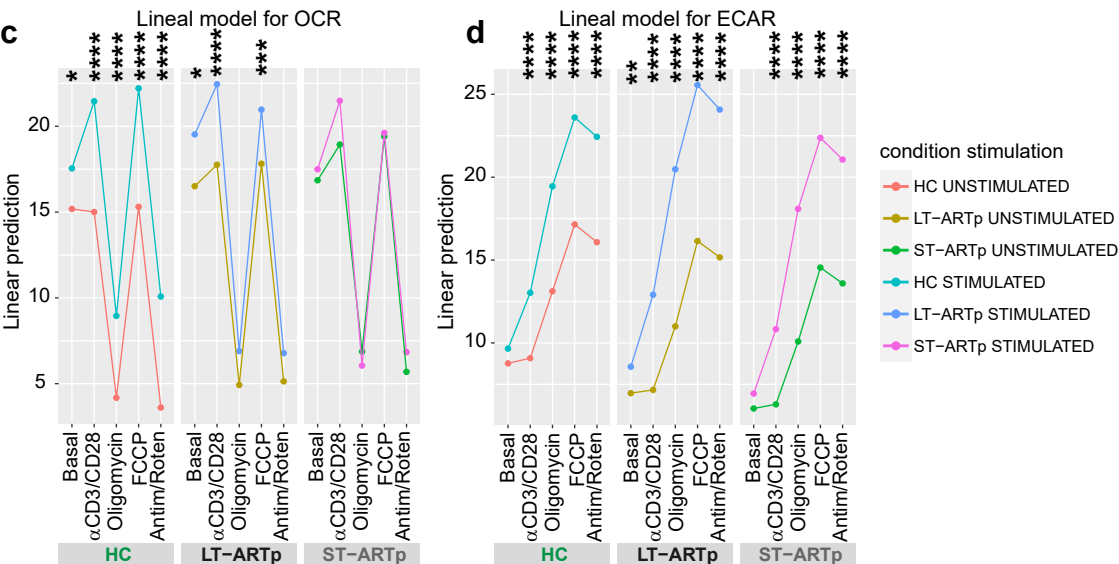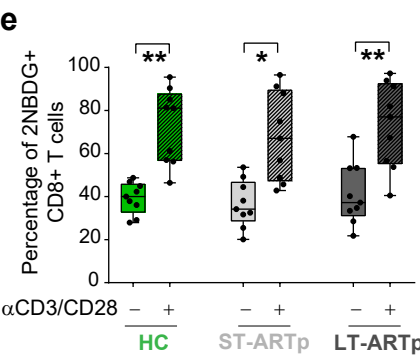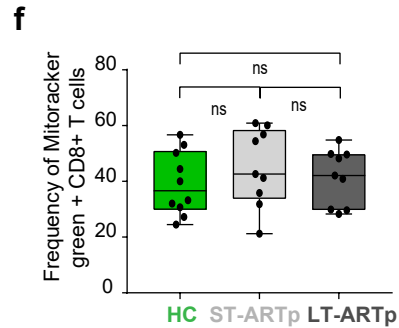

Supplement: mmc9.pdf [file mmc9.pdf]
